# Supplementary material
Source: PubMed Central journal article supplement (PMC2631547)
Supplement: NIHMS62029-supplement-si20070115_043.pdf [file NIHMS62029-supplement-si20070115_043.pdf]

## Supporting Information

### Quantitative Conformationally Sampled Pharmacophore (CSP) for $\delta$ Opioid Ligands: Reevaluation of hydrophobic moieties essential for biological activity

Denzil Bernard, Andrew Coop, and Alexander D. MacKerell Jr.\*

Department of Pharmaceutical Sciences, School of Pharmacy, University of Maryland  
Baltimore, Baltimore, Maryland 21201

#### Contents:

Table S.1: Biological data used for efficacy and affinity modeling.

Table S.2, 3, 5, 9, 11 and 12: Overlap coefficients for all pharmacophoric parameters for each compound for efficacy and affinity models.

Table S.4 and 6: Statistical analysis of initial efficacy models.

Table S.7 and 8: Efficacy models with **7** or **6** as reference compounds

Table S.10: Efficacy models for various B group definitions for **18**.

\* Corresponding author:

Room 601, HSF II, 20 Penn Street, Baltimore MD 21201

[amackere@rx.umaryland.edu](mailto:amackere@rx.umaryland.edu)

Tel: 410-706-7442

Fax: 410-706-5017

**Table S.1.** Biological data for the training set compounds extracted from Clark et al, *J. Pharmacol. Exp. Ther.* **1997**, 283, 501-510.

| Class                | Compound  | Efficacy <sup>a</sup> | Binding Affinity <sup>b</sup> |
|----------------------|-----------|-----------------------|-------------------------------|
| <i>High Efficacy</i> | <b>1</b>  | 1                     | 0.45 (0.38-0.54)              |
|                      | <b>3</b>  | 0.36                  | 40 (36-44)                    |
|                      | <b>7</b>  | 1.02                  | 60 (45-80)                    |
|                      | <b>14</b> | 0.59                  | 81 (65-99)                    |
|                      | <b>15</b> | 0.59                  | 487 (447-531)                 |
|                      | <b>16</b> | 0.8                   | 135 (105-174)                 |
|                      | <b>17</b> | 0.9                   | 93 (80-109)                   |
| <i>Low Efficacy</i>  | <b>2</b>  | 0.08                  | 1.6 (1.5-1.8)                 |
|                      | <b>4</b>  | 0                     | 0.035 (0.032-0.038)           |
|                      | <b>5</b>  | 0.12                  | 6.5 (6.0-7.1)                 |
|                      | <b>6</b>  | 0.18                  | 8.4 (7.3-9.6)                 |
|                      | <b>8</b>  | -                     | 0.079 (0.069-0.086)           |
|                      | <b>9</b>  | -                     | 0.037 (0.034-0.042)           |
|                      | <b>18</b> | 0                     | 37 (29-47)                    |

*a*: Efficacy determined as the maximum stimulation of [<sup>35</sup>S]GTPγS binding by the ligand/the maximum response by **1**.

*b*: K<sub>i</sub> from the EC<sub>50</sub> for inhibition of specific binding of [<sup>3</sup>H]4.

**Table S.2.** Overlap coefficients (OC) of the pharmacophore parameters for the  $\delta$  opioid ligands with respect to **1** obtained using the centroids of pharmacophoric groups as pharmacophore points, i) with sampled probability weighting ii) with equal weighting for all points in conformational space.

i) Centroid

| Compound  | AB-ANB   | AB-NAB   | AB-NBA   | BN-ANB   | BN-NAB   | BN-NBA   | NA-ANB   | NA-NAB   | NA-NBA   |
|-----------|----------|----------|----------|----------|----------|----------|----------|----------|----------|
| <b>2</b>  | 0        | 0        | 0.101498 | 0        | 0        | 0        | 0        | 0        | 0        |
| <b>3</b>  | 0        | 0        | 0.000223 | 0        | 0        | 0        | 0        | 0        | 0        |
| <b>4</b>  | 0        | 0.079188 | 0.000068 | 0.000033 | 0        | 0        | 0.012717 | 0.003073 | 0        |
| <b>5</b>  | 0        | 0.081597 | 0.000065 | 0.000036 | 0        | 0        | 0.013301 | 0.003507 | 0        |
| <b>6</b>  | 0.000426 | 0.220968 | 0.005362 | 0.004085 | 0.00014  | 0.000007 | 0.000269 | 0.000083 | 0.000103 |
| <b>7</b>  | 0.773058 | 0.87797  | 0.85552  | 0.792749 | 0.783931 | 0.732025 | 0.808095 | 0.776915 | 0.818682 |
| <b>14</b> | 0.057979 | 0.012894 | 0.00924  | 0.045088 | 0.12039  | 0.043429 | 0.007695 | 0.007547 | 0.025091 |
| <b>15</b> | 0.064469 | 0.310567 | 0.029161 | 0.112793 | 0.160007 | 0.022073 | 0.084499 | 0.038984 | 0.049857 |
| <b>16</b> | 0.116873 | 0.256307 | 0.031605 | 0.165934 | 0.168538 | 0.038826 | 0.065071 | 0.041299 | 0.051961 |
| <b>17</b> | 0.00007  | 0.00079  | 0.022113 | 0.000299 | 0.003776 | 0.001526 | 0.000075 | 0.00003  | 0.005938 |

ii) Centroid=

| Compound  | AB-ANB   | AB-NAB   | AB-NBA   | BN-ANB   | BN-NAB   | BN-NBA   | NA-ANB   | NA-NAB   | NA-NBA   |
|-----------|----------|----------|----------|----------|----------|----------|----------|----------|----------|
| <b>2</b>  | 0        | 0        | 0.279236 | 0        | 0        | 0        | 0        | 0        | 0        |
| <b>3</b>  | 0        | 0.007501 | 0.185472 | 0        | 0        | 0        | 0        | 0        | 0.009671 |
| <b>4</b>  | 0        | 0.416378 | 0.143666 | 0.091504 | 0        | 0        | 0.285345 | 0.219663 | 0        |
| <b>5</b>  | 0        | 0.410124 | 0.137348 | 0.102236 | 0        | 0        | 0.298971 | 0.228599 | 0        |
| <b>6</b>  | 0.1309   | 0.644167 | 0.274613 | 0.324953 | 0.124757 | 0.030024 | 0.193603 | 0.134542 | 0.08169  |
| <b>7</b>  | 0.854702 | 0.834232 | 0.832562 | 0.816605 | 0.777649 | 0.763432 | 0.721643 | 0.707111 | 0.770838 |
| <b>14</b> | 0.184387 | 0.223879 | 0.176604 | 0.202835 | 0.323014 | 0.216088 | 0.2168   | 0.267273 | 0.275495 |
| <b>15</b> | 0.210913 | 0.337819 | 0.369037 | 0.256642 | 0.30895  | 0.222845 | 0.240309 | 0.280767 | 0.255997 |
| <b>16</b> | 0.193221 | 0.308019 | 0.351983 | 0.231614 | 0.27156  | 0.193142 | 0.232551 | 0.278274 | 0.241426 |
| <b>17</b> | 0.017294 | 0.09131  | 0.349935 | 0.026434 | 0.110069 | 0.121093 | 0.069646 | 0.040586 | 0.217898 |

**Table S.3.** Overlap coefficients (OC) of the pharmacophore parameters for the  $\delta$  opioid ligands with respect to **1** obtained using the most distant atoms between pharmacophoric groups, A and B as pharmacophore points, i) with sampled probability weighting ii) with equal weighting for all points in conformational space.

i) MaxD

| Compound  | AB-ANB   | AB-NAB   | AB-NBA   | BN-ANB   | BN-NAB   | BN-NBA   | NA-ANB   | NA-NAB   | NA-NBA   |
|-----------|----------|----------|----------|----------|----------|----------|----------|----------|----------|
| <b>2</b>  | 0        | 0        | 0.007492 | 0        | 0        | 0        | 0        | 0        | 0        |
| <b>3</b>  | 0        | 0.000037 | 0.057046 | 0        | 0.000019 | 0        | 0        | 0        | 0.000529 |
| <b>4</b>  | 0        | 0.000297 | 0.000996 | 0.001162 | 0.000008 | 0.000069 | 0.050368 | 0.092267 | 0        |
| <b>5</b>  | 0        | 0.000299 | 0.001019 | 0.001205 | 0.000008 | 0.000067 | 0.049747 | 0.090954 | 0        |
| <b>6</b>  | 0.001138 | 0.006364 | 0.044116 | 0.009805 | 0.001433 | 0.000086 | 0.01293  | 0.003295 | 0.000063 |
| <b>7</b>  | 0.877801 | 0.862521 | 0.906859 | 0.863371 | 0.840738 | 0.836287 | 0.84384  | 0.83369  | 0.914309 |
| <b>14</b> | 0.008131 | 0.069736 | 0.074764 | 0.024668 | 0.024471 | 0.002099 | 0.015398 | 0.012378 | 0.021763 |
| <b>15</b> | 0.001921 | 0.01835  | 0.070327 | 0.010232 | 0.009454 | 0.002889 | 0.020799 | 0.00843  | 0.025072 |
| <b>16</b> | 0.064178 | 0.218799 | 0.084515 | 0.125446 | 0.098641 | 0.012334 | 0.02939  | 0.021944 | 0.040306 |
| <b>17</b> | 0.000028 | 0.00037  | 0        | 0.000062 | 0.000359 | 0        | 0.00015  | 0.000021 | 0        |

ii) MaxD=

| Compound  | AB-ANB   | AB-NAB   | AB-NBA   | BN-ANB   | BN-NAB   | BN-NBA   | NA-ANB   | NA-NAB   | NA-NBA   |
|-----------|----------|----------|----------|----------|----------|----------|----------|----------|----------|
| <b>2</b>  | 0        | 0        | 0.243021 | 0        | 0        | 0        | 0        | 0        | 0        |
| <b>3</b>  | 0.001318 | 0.059892 | 0.425679 | 0        | 0.055935 | 0        | 0        | 0        | 0.254919 |
| <b>4</b>  | 0.006042 | 0.121844 | 0.212793 | 0.203099 | 0.022993 | 0.112956 | 0.401597 | 0.387985 | 0        |
| <b>5</b>  | 0.006115 | 0.116242 | 0.215273 | 0.199653 | 0.019161 | 0.11343  | 0.410183 | 0.390259 | 0        |
| <b>6</b>  | 0.110273 | 0.330804 | 0.352174 | 0.336659 | 0.243425 | 0.144759 | 0.342702 | 0.273682 | 0.128155 |
| <b>7</b>  | 0.866672 | 0.860403 | 0.849798 | 0.831695 | 0.843126 | 0.814867 | 0.791782 | 0.791976 | 0.842678 |
| <b>14</b> | 0.277903 | 0.490142 | 0.482687 | 0.341909 | 0.332659 | 0.341528 | 0.335554 | 0.315107 | 0.331111 |
| <b>15</b> | 0.182369 | 0.343814 | 0.41009  | 0.263747 | 0.256638 | 0.278786 | 0.335672 | 0.306372 | 0.284168 |
| <b>16</b> | 0.337089 | 0.422644 | 0.376865 | 0.376684 | 0.364308 | 0.282081 | 0.331229 | 0.33415  | 0.256687 |
| <b>17</b> | 0.027162 | 0.125897 | 0        | 0.047612 | 0.11537  | 0        | 0.1156   | 0.06036  | 0        |

**Table S.4.** Statistical analysis of regression models with  $R^2$  values 0.9 and greater from Table 2. The values for the regression parameters and the corresponding P-values are listed for the different 2D pharmacophoric parameter OC combinations.

i) Centroid=

| <b>2D Pharmacophoric Parameters</b> | <b>R<sup>2</sup></b> | <b>Intercept</b> | <b>Coefficient 1</b> | <b>Coefficient 2</b> | <b>Coefficient 3</b> |
|-------------------------------------|----------------------|------------------|----------------------|----------------------|----------------------|
| NA-NBA + BN-NAB                     | 0.898                | 0.123<br>0.079   | 5.029<br>0.002       | -2.574<br>0.028      |                      |
| AB-NBA + BN-NAB + NA-NBA            | 0.904                | 0.050<br>0.733   | 0.370<br>0.582       | -2.445<br>0.053      | 4.726<br>0.010       |
| NA-NBA + BN-NAB + AB-ANB            | 0.910                | 0.107<br>0.150   | 6.165<br>0.016       | -4.916<br>0.161      | 2.147<br>0.447       |
| NA-NBA + BN-NAB + AB-NAB            | 0.910                | 0.176<br>0.103   | 4.591<br>0.011       | -2.157<br>0.095      | -0.194<br>0.453      |
| NA-NBA + BN-NAB + BN-ANB            | 0.901                | 0.144<br>0.142   | 4.712<br>0.018       | -2.152<br>0.199      | -0.263<br>0.715      |
| NA-NBA + BN-NAB + BN-NBA            | 0.899                | 0.129<br>0.114   | 4.675<br>0.046       | -2.797<br>0.086      | 0.746<br>0.810       |
| NA-NBA + BN-NAB + NA-ANB            | 0.912                | 0.180<br>0.093   | 4.671<br>0.008       | -2.166<br>0.085      | -0.384<br>0.411      |
| NA-NBA + BN-NAB + NA-NAB            | 0.905                | 0.160<br>0.117   | 4.699<br>0.010       | -2.106<br>0.138      | -0.352<br>0.553      |

ii) MaxD=

| <b>2D Pharmacophoric Parameters</b> | <b>R<sup>2</sup></b> | <b>Intercept</b> | <b>Coefficient 1</b> | <b>Coefficient 2</b> | <b>Coefficient 3</b> |
|-------------------------------------|----------------------|------------------|----------------------|----------------------|----------------------|
| AB-NBA + NA-NBA                     | 0.936                | 0.910<br>0.0001  | -3.763<br>0.0002     | 4.512<br>0.0001      |                      |
| AB-NBA + BN-ANB + NA-NBA            | 0.944                | 0.892<br>0.0003  | -3.821<br>0.0005     | 0.220<br>0.4545      | 4.455<br>0.0003      |
| AB-NBA + BN-NAB + NA-NBA            | 0.961                | 0.837<br>0.0002  | -3.517<br>0.0004     | 0.594<br>0.1363      | 3.831<br>0.0010      |
| AB-NBA + BN-NBA + NA-NBA            | 0.942                | 0.900<br>0.0003  | -3.790<br>0.0005     | 0.273<br>0.4997      | 4.359<br>0.0005      |
| AB-NBA + AB-ANB + NA-NBA            | 0.972                | 0.872<br>0.0001  | -3.584<br>0.0001     | 0.736<br>0.0556      | 3.840<br>0.0003      |
| AB-NBA + AB-NAB + NA-NBA            | 0.947                | 0.870<br>0.000   | -3.697<br>0.000      | 0.289<br>0.361       | 4.194<br>0.001       |
| AB-NBA + NA-ANB + NA-NBA            | 0.936                | 0.909<br>0.0004  | -3.763<br>0.0007     | 0.002<br>0.9942      | 4.512<br>0.0004      |
| AB-NBA + NA-NAB + NA-NBA            | 0.936                | 0.908<br>0.000   | -3.770<br>0.001      | 0.015<br>0.953       | 4.516<br>0.000       |

**Table S.5.** Overlap coefficients for the pharmacophoric parameters of **17**, using Phe<sup>4</sup>/ Leu<sup>5</sup> as the hydrophobic group, B. The various measurements of overlap coefficients are shown with the values obtained using Leu<sup>5</sup> labeled B2.

| <b>Pharmacophoric Parameter</b> | <b>AB-ANB</b> | <b>AB-NAB</b> | <b>AB-NBA</b> | <b>BN-ANB</b> | <b>BN-NAB</b> | <b>BN-NBA</b> | <b>NA-ANB</b> | <b>NA-NAB</b> | <b>NA-NBA</b> |
|---------------------------------|---------------|---------------|---------------|---------------|---------------|---------------|---------------|---------------|---------------|
| Centroid                        | 0.00007       | 0.00079       | 0.02211       | 0.00030       | 0.00378       | 0.00153       | 0.00008       | 0.00003       | 0.00594       |
| B2-Centroid                     | 0.00200       | 0.03213       | 0.18284       | 0.00417       | 0.00377       | 0.00092       | 0.00698       | 0.00074       | 0.01779       |
| Centroid=                       | 0.01729       | 0.09131       | 0.34994       | 0.02643       | 0.11007       | 0.12109       | 0.06965       | 0.04059       | 0.21790       |
| B2-Centroid=                    | 0.09617       | 0.22610       | 0.32401       | 0.12879       | 0.15201       | 0.15276       | 0.19293       | 0.21599       | 0.23493       |
| MaxD                            | 0.00003       | 0.00037       | 0.00000       | 0.00006       | 0.00036       | 0.00000       | 0.00015       | 0.00002       | 0.00000       |
| B2-MaxD                         | 0.00055       | 0.00189       | 0.18062       | 0.00098       | 0.00215       | 0.00100       | 0.02070       | 0.00430       | 0.02243       |
| MaxD=                           | 0.02716       | 0.12590       | 0.00000       | 0.04761       | 0.11537       | 0.00000       | 0.11560       | 0.06036       | 0.00000       |
| B2-MaxD=                        | 0.07988       | 0.17780       | 0.38106       | 0.12709       | 0.15114       | 0.15954       | 0.35330       | 0.23011       | 0.25806       |

**Table S.6.** Efficacy predictions using combinations of two 2D pharmacophore parameters with different measures of overlap coefficients. The recalculated OC parameters for **17** with Leu<sup>5</sup> residue (B2) as the hydrophobic B group were used for this analysis.

| 2D Pharmacophoric Parameters | R <sup>2</sup> |           |              |       |
|------------------------------|----------------|-----------|--------------|-------|
|                              | Centroid       | Centroid= | MaxD         | MaxD= |
| AB-NBA + AB-ANB              | 0.704          | 0.539     | <b>0.927</b> | 0.605 |
| AB-NBA + AB-NAB              | 0.351          | 0.412     | <b>0.944</b> | 0.534 |
| AB-NBA + BN-ANB              | 0.646          | 0.394     | <b>0.932</b> | 0.529 |
| AB-NBA + BN-NAB              | 0.700          | 0.614     | <b>0.942</b> | 0.576 |
| AB-NBA + BN-NBA              | 0.692          | 0.738     | <b>0.949</b> | 0.590 |
| AB-NBA + NA-ANB              | 0.480          | 0.415     | 0.830        | 0.582 |
| AB-NBA + NA-NAB              | 0.564          | 0.523     | 0.827        | 0.557 |
| AB-NBA + NA-NBA              | 0.741          | 0.792     | <b>0.978</b> | 0.891 |

**Table S.7.** Efficacy predictions using combinations of two 2D pharmacophore parameters with different measures of overlap coefficients. **7** was used as the reference compound in the calculations of OC.

| 2D Pharmacophoric Parameter | Centroid | R <sup>2</sup> |              |       |
|-----------------------------|----------|----------------|--------------|-------|
|                             |          | Centroid=      | MaxD         | MaxD= |
| AB-NBA + AB-ANB             | 0.869    | 0.410          | <b>0.902</b> | 0.590 |
| AB-NBA + AB-NAB             | 0.413    | 0.277          | <b>0.908</b> | 0.504 |
| AB-NBA + BN-ANB             | 0.743    | 0.278          | <b>0.910</b> | 0.416 |
| AB-NBA + BN-NAB             | 0.821    | 0.593          | <b>0.909</b> | 0.586 |
| AB-NBA + BN-NBA             | 0.900    | 0.739          | 0.859        | 0.497 |
| AB-NBA + NA-ANB             | 0.777    | 0.581          | 0.738        | 0.587 |
| AB-NBA + NA-NAB             | 0.899    | 0.791          | 0.762        | 0.364 |
| AB-NBA + NA-NBA             | 0.873    | 0.852          | <b>0.946</b> | 0.750 |
| NA-NBA + AB-ANB             | 0.875    | 0.819          | <b>0.958</b> | 0.747 |
| NA-NBA + AB-NAB             | 0.880    | 0.820          | <b>0.966</b> | 0.706 |
| NA-NBA + BN-ANB             | 0.871    | 0.835          | <b>0.964</b> | 0.713 |
| NA-NBA + BN-NAB             | 0.872    | 0.829          | <b>0.965</b> | 0.735 |
| NA-NBA + BN-NBA             | 0.887    | 0.840          | <b>0.986</b> | 0.712 |
| NA-NBA + NA-ANB             | 0.871    | 0.842          | <b>0.953</b> | 0.735 |
| NA-NBA + NA-NAB             | 0.887    | 0.872          | <b>0.968</b> | 0.713 |

**Table S.8.** Efficacy predictions using combinations of three 2D pharmacophore parameters with different measures of overlap coefficients. **6** was used as the reference compound in the calculations of OC.

| 2D Pharmacophoric Parameter | R <sup>2</sup> |           |       |              |
|-----------------------------|----------------|-----------|-------|--------------|
|                             | Centroid       | Centroid= | MaxD  | MaxD=        |
| AB-NBA + BN-ANB + NA-NBA    | 0.343          | 0.366     | 0.785 | 0.856        |
| AB-NBA + BN-NAB + NA-NBA    | 0.347          | 0.449     | 0.763 | 0.828        |
| AB-NBA + AB-ANB + NA-NBA    | 0.345          | 0.428     | 0.771 | 0.804        |
| AB-NBA + AB-NAB + NA-NBA    | 0.675          | 0.394     | 0.775 | 0.867        |
| AB-NBA + NA-ANB + NA-NBA    | 0.449          | 0.736     | 0.773 | <b>0.944</b> |
| AB-NBA + NA-NAB + NA-NBA    | 0.607          | 0.478     | 0.720 | 0.838        |
| NA-NBA + BN-NAB + AB-ANB    | 0.358          | 0.472     | 0.184 | 0.809        |
| NA-NBA + BN-NAB + AB-NAB    | 0.427          | 0.427     | 0.441 | 0.891        |
| NA-NBA + BN-NAB + AB-NBA    | 0.347          | 0.449     | 0.763 | 0.828        |
| NA-NBA + BN-NAB + BN-ANB    | 0.373          | 0.482     | 0.172 | 0.803        |
| NA-NBA + BN-NAB + BN-NBA    | 0.170          | 0.670     | 0.351 | 0.882        |
| NA-NBA + BN-NAB + NA-ANB    | 0.209          | 0.780     | 0.344 | <b>0.966</b> |
| NA-NBA + BN-NAB + NA-NAB    | 0.279          | 0.384     | 0.144 | 0.836        |
| NA-NBA + NA-NAB + AB-ANB    | 0.344          | 0.436     | 0.148 | 0.886        |
| NA-NBA + NA-NAB + AB-NAB    | 0.453          | 0.434     | 0.148 | 0.821        |
| NA-NBA + NA-NAB + AB-NBA    | 0.607          | 0.478     | 0.720 | 0.838        |
| NA-NBA + NA-NAB + BN-ANB    | 0.298          | 0.480     | 0.148 | 0.817        |
| NA-NBA + NA-NAB + BN-NAB    | 0.279          | 0.384     | 0.144 | 0.836        |
| NA-NBA + NA-NAB + BN-NBA    | 0.394          | 0.439     | 0.455 | <b>0.968</b> |
| NA-NBA + NA-NAB + NA-ANB    | 0.602          | 0.617     | 0.849 | <b>0.929</b> |



**Table S.10.** Efficacy predictions using combinations of two 2D pharmacophore parameters for the MaxD based calculation of OC. Four different groups, Phe<sup>4</sup> (B1), allylic amino groups (B1, B2 & B2-3), Leu<sup>5</sup> (B4) were used for the definition of the pharmacophoric B group in this analysis for **18**.

| 2D Pharmacophoric Parameter | R <sup>2</sup> |              |              |              |              |
|-----------------------------|----------------|--------------|--------------|--------------|--------------|
|                             | B1             | B2           | B3           | B4           | B2-3         |
| AB-NBA + AB-ANB             | 0.688          | <b>0.931</b> | <b>0.931</b> | 0.785        | <b>0.931</b> |
| AB-NBA + AB-NAB             | 0.742          | <b>0.947</b> | <b>0.947</b> | <b>0.879</b> | <b>0.947</b> |
| AB-NBA + BN-ANB             | 0.700          | <b>0.937</b> | <b>0.937</b> | 0.842        | <b>0.937</b> |
| AB-NBA + BN-NAB             | 0.695          | <b>0.946</b> | <b>0.946</b> | 0.822        | <b>0.946</b> |
| AB-NBA + BN-NBA             | 0.782          | <b>0.951</b> | <b>0.952</b> | 0.774        | <b>0.952</b> |
| AB-NBA + NA-ANB             | 0.728          | 0.849        | 0.850        | 0.802        | 0.850        |
| AB-NBA + NA-NAB             | 0.720          | 0.844        | 0.844        | 0.787        | 0.844        |
| AB-NBA + NA-NBA             | 0.727          | <b>0.905</b> | <b>0.910</b> | <b>0.905</b> | <b>0.909</b> |

**Table S.11.** Overlap Coefficients (OC) of the pharmacophore parameters for the  $\delta$  opioid ligands with respect to **4** obtained using the centroids of the pharmacophoric groups as pharmacophoric points, i) with sampled probability weighting ii) with equal weighting for all points in conformational space. Different definitions for the hydrophobic B group in **17** and **18** are indicated with the compound number.

i) Centroid

| Compound       | AB-ANB   | AB-NAB   | AB-NBA   | BN-ANB   | BN-NAB   | BN-NBA   | NA-ANB   | NA-NAB   | NA-NBA   |
|----------------|----------|----------|----------|----------|----------|----------|----------|----------|----------|
| <b>1</b>       | 0        | 0.079188 | 0.000068 | 0.000033 | 0        | 0        | 0.012717 | 0.003073 | 0        |
| <b>2</b>       | 0        | 0        | 0        | 0        | 0        | 0        | 0        | 0        | 0.000003 |
| <b>3</b>       | 0        | 0        | 0        | 0        | 0        | 0        | 0        | 0        | 0.074961 |
| <b>4</b>       | 1        | 1        | 1        | 1        | 1        | 1        | 1        | 1        | 1        |
| <b>5</b>       | 0.9992   | 0.997443 | 0.996095 | 0.999102 | 0.998348 | 0.996672 | 0.9955   | 0.995601 | 0.996654 |
| <b>6</b>       | 0.003193 | 0.003532 | 0.005945 | 0.002898 | 0.002602 | 0.010281 | 0.016834 | 0.0967   | 0.011091 |
| <b>7</b>       | 0        | 0.048341 | 0.000005 | 0.002387 | 0        | 0        | 0.000582 | 0.000004 | 0        |
| <b>8</b>       | 0.000529 | 0.000371 | 0.000333 | 0.000536 | 0.000449 | 0.008716 | 0.000863 | 0.00105  | 0.036227 |
| <b>9</b>       | 0.993379 | 0.993254 | 0.994837 | 0.993125 | 0.993281 | 0.998909 | 0.997245 | 0.998471 | 0.998472 |
| <b>14</b>      | 0.000703 | 0.000337 | 0.000066 | 0.000422 | 0.000781 | 0.000001 | 0.000915 | 0.002287 | 0.000002 |
| <b>15</b>      | 0.265787 | 0.310746 | 0.146626 | 0.263123 | 0.192035 | 0.048982 | 0.018665 | 0.017821 | 0.010481 |
| <b>16</b>      | 0.231582 | 0.201463 | 0.147881 | 0.21944  | 0.162016 | 0.05419  | 0.027665 | 0.028043 | 0.016655 |
| <b>17</b>      | 0.000147 | 0.000287 | 0.048409 | 0.000184 | 0.000411 | 0.000021 | 0.000004 | 0.000005 | 0.001479 |
| <b>17-B2</b>   | 0.020821 | 0.014038 | 0.110769 | 0.012807 | 0.010746 | 0.040935 | 0.041905 | 0.01251  | 0.028142 |
| <b>18</b>      | 0.305473 | 0.213941 | 0.136432 | 0.240415 | 0.229692 | 0.04024  | 0.020115 | 0.034518 | 0.017242 |
| <b>18-B2</b>   | 0        | 0        | 0.000639 | 0        | 0        | 0        | 0.00451  | 0        | 0.000139 |
| <b>18-B3</b>   | 0        | 0        | 0.055214 | 0        | 0        | 0        | 0        | 0        | 0.012634 |
| <b>18-B4</b>   | 0        | 0        | 0        | 0        | 0        | 0        | 0.028041 | 0.013656 | 0        |
| <b>18-B2-3</b> | 0        | 0        | 0.140637 | 0        | 0        | 0        | 0        | 0        | 0.022958 |

ii) Centroid=

| Compound       | AB-ANB   | AB-NAB   | AB-NBA   | BN-ANB   | BN-NAB   | BN-NBA   | NA-ANB   | NA-NAB   | NA-NBA   |
|----------------|----------|----------|----------|----------|----------|----------|----------|----------|----------|
| <b>1</b>       | 0        | 0.416378 | 0.143666 | 0.091504 | 0        | 0        | 0.285345 | 0.219663 | 0        |
| <b>2</b>       | 0        | 0        | 0.01715  | 0        | 0        | 0        | 0        | 0        | 0.135613 |
| <b>3</b>       | 0        | 0        | 0        | 0        | 0        | 0        | 0        | 0        | 0.732675 |
| <b>4</b>       | 1        | 1        | 1        | 1        | 1        | 1        | 1        | 1        | 1        |
| <b>5</b>       | 0.929412 | 0.897083 | 0.866044 | 0.933081 | 0.91291  | 0.905313 | 0.915161 | 0.8965   | 0.964901 |
| <b>6</b>       | 0.36802  | 0.386941 | 0.477868 | 0.334318 | 0.395413 | 0.474424 | 0.547473 | 0.630667 | 0.573068 |
| <b>7</b>       | 0        | 0.395273 | 0.030376 | 0.23843  | 0        | 0.012671 | 0.206232 | 0.057596 | 0        |
| <b>8</b>       | 0.176949 | 0.187321 | 0.294602 | 0.156237 | 0.201057 | 0.394611 | 0.248003 | 0.326207 | 0.544415 |
| <b>9</b>       | 0.915929 | 0.915806 | 0.898249 | 0.902004 | 0.913043 | 0.88426  | 0.894475 | 0.902973 | 0.931034 |
| <b>14</b>      | 0.045645 | 0.024967 | 0.0291   | 0.037132 | 0.060068 | 0.010238 | 0.143402 | 0.211652 | 0.021041 |
| <b>15</b>      | 0.115172 | 0.153013 | 0.189341 | 0.121944 | 0.130708 | 0.142615 | 0.183716 | 0.218475 | 0.171065 |
| <b>16</b>      | 0.104071 | 0.134218 | 0.179708 | 0.107254 | 0.114889 | 0.124114 | 0.192079 | 0.217982 | 0.159007 |
| <b>17</b>      | 0.025687 | 0.028096 | 0.167334 | 0.020594 | 0.033807 | 0.027778 | 0.022697 | 0.032057 | 0.164861 |
| <b>17-B2</b>   | 0.103952 | 0.132784 | 0.171291 | 0.106784 | 0.115942 | 0.121082 | 0.202326 | 0.237051 | 0.161709 |
| <b>18</b>      | 0.096058 | 0.113873 | 0.168157 | 0.098273 | 0.097828 | 0.142344 | 0.216748 | 0.230022 | 0.189567 |
| <b>18-B2</b>   | 0        | 0        | 0.157464 | 0        | 0        | 0        | 0.190867 | 0        | 0.087637 |
| <b>18-B3</b>   | 0        | 0        | 0.263935 | 0        | 0        | 0        | 0        | 0        | 0.172818 |
| <b>18-B4</b>   | 0        | 0        | 0.001987 | 0        | 0        | 0.00261  | 0.206096 | 0.215985 | 0        |
| <b>18-B2-3</b> | 0        | 0        | 0.226832 | 0        | 0        | 0        | 0        | 0        | 0.153674 |

**Table S.12.** Overlap Coefficients (OC) of the pharmacophore parameters for the  $\delta$  opioid ligands with respect to **4** obtained using the most distant atoms between the pharmacophoric groups, A and B as pharmacophore points, i) with sampled probability weighting ii) with equal weighting for all points in conformational space. Different definitions for the hydrophobic B group in **17** and **18** are indicated with the compound number.

i) MaxD

| Compound       | AB-ANB   | AB-NAB   | AB-NBA   | BN-ANB   | BN-NAB   | BN-NBA   | NA-ANB   | NA-NAB   | NA-NBA   |
|----------------|----------|----------|----------|----------|----------|----------|----------|----------|----------|
| <b>1</b>       | 0        | 0.000297 | 0.000996 | 0.001162 | 0.000008 | 0.000069 | 0.050368 | 0.092267 | 0        |
| <b>2</b>       | 0        | 0        | 0.0492   | 0        | 0        | 0        | 0        | 0        | 0.092871 |
| <b>3</b>       | 0        | 0        | 0.000001 | 0        | 0        | 0.000099 | 0        | 0        | 0        |
| <b>4</b>       | 1        | 1        | 1        | 1        | 1        | 1        | 1        | 1        | 1        |
| <b>5</b>       | 0.998144 | 0.997447 | 0.996182 | 0.998497 | 0.998336 | 0.998289 | 0.994872 | 0.99484  | 0.99719  |
| <b>6</b>       | 0.009136 | 0.002382 | 0.001976 | 0.00744  | 0.005214 | 0.05046  | 0.008297 | 0.020199 | 0.002768 |
| <b>7</b>       | 0        | 0.000023 | 0.000165 | 0.001761 | 0        | 0.00061  | 0.002708 | 0.000632 | 0        |
| <b>8</b>       | 0.000651 | 0.000026 | 0.000341 | 0.000198 | 0.00015  | 0.000527 | 0.000143 | 0.00011  | 0.008698 |
| <b>9</b>       | 0.990065 | 0.994663 | 0.997533 | 0.995303 | 0.990823 | 0.995592 | 0.996676 | 0.996817 | 0.996455 |
| <b>14</b>      | 0.093061 | 0.04515  | 0.032653 | 0.07044  | 0.062849 | 0.052161 | 0.057448 | 0.056057 | 0.0304   |
| <b>15</b>      | 0.080481 | 0.129881 | 0.092059 | 0.084626 | 0.068954 | 0.090706 | 0.032777 | 0.02786  | 0.064724 |
| <b>16</b>      | 0.170757 | 0.070597 | 0.081941 | 0.148518 | 0.074903 | 0.085747 | 0.094005 | 0.087233 | 0.035226 |
| <b>17</b>      | 0.000203 | 0.000119 | 0        | 0.000131 | 0.000084 | 0        | 0.000037 | 0.000043 | 0        |
| <b>17-B2</b>   | 0.003827 | 0.002473 | 0.068911 | 0.001865 | 0.001653 | 0.002716 | 0.066881 | 0.019242 | 0.072754 |
| <b>18</b>      | 0.11398  | 0.094003 | 0.130703 | 0.096499 | 0.091896 | 0.123961 | 0.277686 | 0.240881 | 0.11175  |
| <b>18-B2</b>   | 0        | 0        | 0.12348  | 0        | 0        | 0        | 0.003521 | 0        | 0.002206 |
| <b>18-B3</b>   | 0        | 0        | 0.060117 | 0        | 0        | 0        | 0        | 0        | 0.004001 |
| <b>18-B4</b>   | 0.00018  | 0.00017  | 0.001327 | 0.000076 | 0.000118 | 0.001404 | 0.226103 | 0.242291 | 0.000253 |
| <b>18-B2-3</b> | 0        | 0        | 0.063508 | 0        | 0        | 0        | 0        | 0        | 0.004312 |

ii) MaxD=

| Compound       | AB-ANB   | AB-NAB   | AB-NBA   | BN-ANB   | BN-NAB   | BN-NBA   | NA-ANB   | NA-NAB   | NA-NBA   |
|----------------|----------|----------|----------|----------|----------|----------|----------|----------|----------|
| <b>1</b>       | 0.006042 | 0.121844 | 0.212793 | 0.203099 | 0.022993 | 0.112956 | 0.401597 | 0.387985 | 0        |
| <b>2</b>       | 0        | 0        | 0.343025 | 0        | 0        | 0        | 0        | 0        | 0.58191  |
| <b>3</b>       | 0        | 0        | 0.015293 | 0        | 0        | 0.095507 | 0        | 0        | 0.028028 |
| <b>4</b>       | 1        | 1        | 1        | 1        | 1        | 1        | 1        | 1        | 1        |
| <b>5</b>       | 0.910909 | 0.901773 | 0.910539 | 0.88983  | 0.912037 | 0.887037 | 0.909768 | 0.8989   | 0.880597 |
| <b>6</b>       | 0.480128 | 0.46239  | 0.500997 | 0.530093 | 0.486971 | 0.621849 | 0.50942  | 0.554314 | 0.572281 |
| <b>7</b>       | 0        | 0.037809 | 0.122084 | 0.177891 | 0.002017 | 0.210733 | 0.366864 | 0.2346   | 0        |
| <b>8</b>       | 0.20884  | 0.091803 | 0.188357 | 0.146619 | 0.11738  | 0.281838 | 0.14694  | 0.136077 | 0.401098 |
| <b>9</b>       | 0.906943 | 0.894354 | 0.908654 | 0.876874 | 0.897235 | 0.901695 | 0.902181 | 0.89748  | 0.931542 |
| <b>14</b>      | 0.181453 | 0.235853 | 0.258008 | 0.186091 | 0.209678 | 0.225637 | 0.254003 | 0.298019 | 0.229333 |
| <b>15</b>      | 0.171824 | 0.223751 | 0.265534 | 0.184907 | 0.191614 | 0.213687 | 0.267372 | 0.296925 | 0.209331 |
| <b>16</b>      | 0.145416 | 0.177883 | 0.243675 | 0.148284 | 0.151499 | 0.175863 | 0.264145 | 0.282767 | 0.190822 |
| <b>17</b>      | 0.020584 | 0.031145 | 0        | 0.015931 | 0.035608 | 0        | 0.035413 | 0.035301 | 0        |
| <b>17-B2</b>   | 0.1144   | 0.153207 | 0.236652 | 0.115512 | 0.12337  | 0.152402 | 0.27726  | 0.235328 | 0.189235 |
| <b>18</b>      | 0.138974 | 0.159235 | 0.227241 | 0.141147 | 0.137229 | 0.191977 | 0.300047 | 0.314962 | 0.206909 |
| <b>18-B2</b>   | 0        | 0        | 0.316965 | 0        | 0        | 0        | 0.234035 | 0        | 0.174104 |
| <b>18-B3</b>   | 0        | 0        | 0.35871  | 0        | 0        | 0        | 0.002458 | 0        | 0.199814 |
| <b>18-B4</b>   | 0.013952 | 0.012042 | 0.10219  | 0.009906 | 0.01226  | 0.079436 | 0.294924 | 0.299598 | 0.080135 |
| <b>18-B2-3</b> | 0        | 0        | 0.375375 | 0        | 0        | 0        | 0        | 0        | 0.211962 |
